# Supplementary material for: The effect of aging in primary human dermal fibroblasts
Source: PLoS One. 2019 Jul 3;14(7):e0219165. doi: 10.1371/journal.pone.0219165 (PMC6608952; doi:10.1371/journal.pone.0219165)
Supplement: S4 File — The statistical significance between the three in-vitro models groups using the ΔΔCt results from the real-time PCR assay was obtained by performing ANOVA in the XLSTAT 2007 program. For the Scepter Cell Counter assay, this was analyzed by Test Z, XLSTAT 2007 program. (XLSX) [file pone.0219165.s004.xlsx]

## Sheet: Plan12
	jovens	1.23676
	irradiados	0.820475
	velhos	0.852189

## Sheet: Plan14
	jovens	1.14774
	irradiados	0.785387
	velhos	1.02491

## Sheet: Plan16
	jovens	1.29679
	irradiados	0.688055
	velhos	1.01962

## Sheet: Plan18
	jovens	1.19598
	irradiados	0.550967
	velhos	0.584633

## Sheet: Plan21
	jovens	16.9445
	irradiados	19.86
	velhos	18.15

## Sheet: Plan2
	jovens	1.26834
	irradiados	0.550967
	velhos	0.515031

## Sheet: Plan4
	jovens	1.26834
	irradiados	0.57289
	velhos	0.584633

## Sheet: Plan6
	jovens	1.19598
	irradiados	0.550967
	velhos	0.584633

## Sheet: Ct todos 
ddCt		casp-3	sirt-1	LMNA	col 1a1	col 1a2	col 3a1	col 4a1	col 7a1	MMP1	MMP2	MMP3	MMP7	MMP8	MMP9	MMP10	MMP12	MMP13	MMP14	TIMP1	TIMP2	TIMP3	TIMP4	IL1B	IL1A	IL6	IL8	IL10	TP53	PTGS2	PTGS2_2	ICAM-1	COX-2	TNF-a	DEFB4	gzmb	PTGES2
Ct	jovens	17.4425	27.0625	22.2525	17.4425	19.5475	18.545	24.5725	24.81	17.125	10.285	26.2425	20.58	32.66	31.165	24.45	29.4775	34.02	18.4525	31.38	21.6875	16.9475	25.7667	20.3025	16.97	25.465	27.6925	21.2867	21.92	23.2375
	jovens	16.8696	26.6525	22.01	16.56	19.445	19.5025	21.28	26.1975	22.815	11.3475	23.0225	21.6933	33.5567	35.95	23.105	28.515	30.21	19.98	34.15	22.7025	18.5175	27.8925	22.5525	17.825	29.4025	27.1825	18.355	21.6425	25.1925
	jovens	17.7125	26.6475	21.5925	17.7125	19.81	18.4525	25.38	25.2725	20.36	10.31	21.0075	20.2	31.0625	35.0025	24.27	29	38.125	19.675	31.3067	22.08	16.6925	27.3533	19.9675	14.7375	26.9325	26.56	24.2333	21.095	24.1175
	jovens	16.1975	26.3675	21.6925	16.1975	18.9475	16.87	22.9925	25.34	18.1125	10.3975	22.68	21.01	33.3025	34.1933	24.32	30.77	34.115	18.6267	30.895	22.1	17.57	26.81	22.995	16.59	29.6767	25.795	26.31	20.9775	23.875
	jovens	16.495	26.6475	22.1225	16.495	19.035	18.485	22.695	24.8925	18.1125	10.4	21.1175	20.2267	27.4567	33.74	22.92	30.225	33.865	18.615	29.77	22.3275	16.9075	27.35	18.3475	14	25.9625	24.5825	25.28	20.845	22.84
	jovens	16.81	27.1875	21.885	16.81	19.325	18.435	22.805	26.3425	23.35	9.86333	28.4725	19.6875	37.2067	36.72	25.6267	31.57	34.17	18.9125	30.1975	21.5925	19.4125	29.8475	20.52	17.6	26.6275	28.1325	32.2333	21.665	25.125
	irradiados	26.165	26.56	20.78	19.1	20.345	20.7075	23.345	23.2225	19.1	12.0133	22.89	26.9967	35.275	22.99	17.3267	26.8425	35.3267	17.385	28.7475	20.65	20.6625	24.315	27.6125	22.5067	28.915	24.73	13.915	20.57	28.2575	#DIV/0!	#DIV/0!	#DIV/0!	#DIV/0!			#DIV/0!
	irradiados	27.3967	26.835	22.755	20.0275	20.755	19.0925	23.0875	23.17	22.4925	11.4767	23.2725	25.655	33.93	11.06	17.4275	31.06	36.335	18.305	29.9833	21.4925	22.78	25.705	24.3625	20.7125	31.5975	25.3425	16.66	20.8775	25.715	#DIV/0!	#DIV/0!	#DIV/0!	#DIV/0!			#DIV/0!
	irradiados	26.2275	26.9325	21.0925	20.085	20.9825	19.7475	23.3775	23.1475	20.1925	12.115	18.1175	28.0867	36.445	22.44	21.695	25.7275	34.1375	17.6475	29.7033	21.06	20.525	25.37	22.0475	18.945	29.755	23.4225	19.72	20.125	26.665	#DIV/0!	#DIV/0!	#DIV/0!	#DIV/0!			#DIV/0!
	irradiados	26.0275	27.1225	21.175	20.47	21.3225	19.2525	23.315	24.025	16.925	11.105	17.8725	25.7125	28.8775	18.625	16.8575	27.3175	32.78	16.8375	29.4367	20.7275	21.4375	25.525	25.9325	22.64	32.7225	24.57	16.965	20.6425	29.1275	#DIV/0!	#DIV/0!	#DIV/0!	#DIV/0!			#DIV/0!
	irradiados	26.165	26.745	21.0975	20.2775	21.51	19.74	23.5425	22.5575	17.235	12.75	16.6125	26.8533	32.925	24.385	18.6133	26.4575	32.3825	17.4475	30.3025	20.89	20.0325	25.8275	19.7775	17.85	25.3175	17.975	25.37	20.135	24.52	#DIV/0!	#DIV/0!	#DIV/0!	#DIV/0!			#DIV/0!
	irradiados	26.86	27.43	21.5425	19.2	20.7725	19.26	23.025	23.2125	22.685	9.9025	25.51	24.5567	29.8033	21.91	16.7825	25.485	33.16	17.3825	28.75	20.2725	21.6275	25.7925	29.0025	22.435	31.08	28.3375	17.5167	20.82	29.9225	#DIV/0!	#DIV/0!	#DIV/0!	#DIV/0!			#DIV/0!
	passagem	27.145	28.8325	24.0575	21.2	23.0833	19.66	24.365	24.5325	20.675	21.3233	18.34	22.1375	31.3725	36.5667	24.72	25.4775	33.8567	18.4975	31.29	23.75	33.9767	26.4925	26.4275	20.56	32.6025	21.785	16.0767	23.67	22.7125
	passagem	26.88	28.125	23.045	18.6375	20.515	17.6575	24.7825	24.105	17.535	17.6567	17.7825	24.6267	33.185	27.74	22.3667	25.2525	19.89	17.3975	31.2975	22.91	35.87	27.8925	22.79	19.05	31.6175	17.7775	16.8767	24.295	25.64
	passagem	28.78	29.85	23.5625	18.79	21.7125	17.3825	26.36	23.81	20.81	15.9025	16.3975	23.0025	38.69	35.2875	21.2033	24.7475	31.5567	17.9975	32.2825	23.655	22.7175	28.63	21.045	16.34	34.73	18.6225	18.98	24.32	23.345
	passagem	27.03	27.7425	22.4075	18.915	21.235	17.01	23.9925	24.3075	28.8933	16.0775	20.045	23.795	36.39	35.74	21.2825	28.2225	34.1	18.36	31.08	23.505	23.485	26.645	27.9333	21.58	33.9875	26.315	15.41	23.155	29.235
	passagem	26.475	28.34	22.8575	18.635	20.7375	17.8575	23.935	24.585	19.43	14.9725	17.1375	24.905	37.26	36.425	22.65	27.6025	34.06	18.2525	32.8725	22.85	23.51	28.3575	20.59	15.2725	38.145	22.53	18.78	23.6825	26.9975
	passagem	28.2975	27.8	24.055	22.5725	22.46	19.86	25.4075	24.4825	31.6567	12.2275	20.64	21.2367	32.4167	36.5867	21.6875	30.075	34.68	18.3725	32.5175	22.7175	24.8625	29.3675	24.96	20.4725	30.23	22.13	20.62	23.63	21.2675
	velhos	23.89	25.05	21.465	17.1325	14.33	16.395	20.8775	24.275	21.895	11.7633	26.4175	28.6233	36.95	38.9967	31.605	28.3725	33.91	18.0175	28.8967	20.915	18.6325	28.345	27.2175	31.9075	26.2175	25.08	10.82	20.915	27.3875	#DIV/0!	#DIV/0!	#DIV/0!	#DIV/0!	#DIV/0!		#DIV/0!
	velhos	24.5825	25.29	20.655	17.635	15.0625	18.7675	25.5225	26.905	18.2425	10.0933	25.4833	24.795	38.49	33.7025	25.2267	23.64	24.68	19.175	30.8533	21.62	18.6075	28.3975	28.8825	32.765	29.4333	23.025	18.6433	21.0225	26.815	#DIV/0!	#DIV/0!	#DIV/0!	#DIV/0!	#DIV/0!		#DIV/0!
	velhos	24.2325	24.7725	21.165	18.2	15.11	18.0075	23.79	27.46	19.5667	10.6567	22.7925	29.3333	35.195	33.3333	28.4433	23.39		19.1925	30.4367	21.085	17.7133	28.97	30.215	33.35	29.9675	23.8175	21.45	21.4575	25.5075	#DIV/0!	#DIV/0!	#DIV/0!	#DIV/0!	#DIV/0!		#DIV/0!
	velhos	24.82	24.7375	21.1875	17.35	14.0875	16.055	25.73	25.6375	23.31	8.89333	25.3367	33.0867	36.685	30.2175	29.53	28.1725	35.9667	18.035	30.675	21.0525	17.69	27.6025	31.13	33.9125	27.7825	21.5975	24.44	21.3125	25.4225	#DIV/0!	#DIV/0!	#DIV/0!	#DIV/0!	#DIV/0!		#DIV/0!
	velhos	24.3775	25.595	24.595	20.4325	17.2825	15.295	21.1225	25.005	21.8125	10.5333	29.8567	31.25	27.49	39.295	32.1533	30.4633	31.805	18.79	29.68	21.4667	19.8333	26.8475		25.4			13.9	23.3825	26.095	#DIV/0!	#DIV/0!	#DIV/0!	#DIV/0!	#DIV/0!		#DIV/0!

## Sheet: Plan7
	jovens	16.8169
	irradiados	26.4736
	passagem	27.4346
	velhos	24.3813

[truncated: 59 more sheets: Plan5, Plan9, Plan11, Plan15, Plan19, Plan22, Plan24, Plan26, Plan28, Plan30, Plan32, Plan34, Plan36, Plan38, Plan40, Plan42, Plan44, Plan46, Plan48, Plan50 …]
